# Supplementary material for: Choosing implementation strategies to address contextual barriers: diversity in recommendations and future directions
Source: Implement Sci. 2019 Apr 29;14:42. doi: 10.1186/s13012-019-0892-4 (PMC6489173; doi:10.1186/s13012-019-0892-4)
Supplement: Supplementary file 1 — The level of endorsement for each of the 2847 possible individual barrier-strategy combinations (XLSX 50 kb) [file 13012_2019_892_MOESM1_ESM.xlsx]

## Sheet: Percent
ERIC Strategies	Intervention Source	Evidence Strength & Quality	Relative advantage	Adaptability	Trialability	Complexity	Design Quality & Packaging	Cost	Patient Needs & Resources	Cosmopolitanism	Peer Pressure	External Policy & Incentives	Structural Characteristics	Networks & Communications	Culture	Implementation Climate	Tension for Change	Compatibility	Relative Priority	Organizational Incentives & Rewards	Goals and Feedback	Learning Climate	Readiness for Implementation	Leadership Engagement	Available Resources	Access to knowledge & information	Knowledge & Beliefs about the Intervention	Self-efficacy	Individual Stage of Change	Individual Identification with Organization	Planning	Opinion Leaders	Formally appointed internal implementation leaders	Champions	External Change Agents	Key Stakeholders	Patients/ Customers	Executing	Reflecting & Evaluating	CFIR per ERIC	Level 1	Level 2
Access new funding	0	0.03125	0.103448	0	0.0384615	0.0333333	0.037037	0.72	0	0.0384615	0.0625	0.0740741	0.0454545	0.0434783	0	0	0	0.0344828	0.107143	0.375	0.030303	0.0384615	0.0384615	0.0909091	0.782609	0	0.08	0	0	0.0357143	0.0769231	0	0.0714286	0.037037	0	0.0416667	0.0454545	0.0344828	0	27	2	1
Alter incentive/allowance structures	0.0384615	0.03125	0.275862	0	0	0.0666667	0	0.44	0.0952381	0	0.46875	0.407407	0.181818	0	0.148148	0.444444	0.217391	0.103448	0.392857	0.708333	0.151515	0.230769	0.230769	0.318182	0.173913	0	0.16	0.037037	0.32	0.285714	0.115385	0.142857	0.0714286	0.0740741	0	0.166667	0	0.172414	0	30	1	12
Alter patient/consumer fees	0.0384615	0	0	0	0	0	0	0.2	0	0	0.03125	0.0740741	0	0	0	0.037037	0	0	0	0.0416667	0	0	0	0	0.217391	0	0	0	0	0	0	0	0	0	0	0	0.227273	0	0	8	0	3
Assess for readiness and identify barriers and facilitators	0.115385	0.125	0.241379	0.307692	0.346154	0.3	0.0740741	0.16	0.333333	0.153846	0.15625	0.037037	0.363636	0.130435	0.407407	0.518519	0.347826	0.344828	0.357143	0.125	0.0606061	0.192308	0.807692	0.136364	0.130435	0.0689655	0.2	0.111111	0.12	0.321429	0.423077	0.142857	0.285714	0.148148	0.111111	0.375	0.136364	0.310345	0.12	39	2	16
Audit and provide feedback	0.0769231	0.125	0.103448	0.0384615	0.153846	0.0333333	0.037037	0.08	0.047619	0	0.15625	0	0.0454545	0.173913	0.037037	0.111111	0.173913	0.0689655	0.142857	0.208333	0.606061	0.153846	0.0384615	0.0454545	0	0.0344828	0.04	0.222222	0.08	0.0714286	0	0.142857	0	0.185185	0.0740741	0.0416667	0	0.172414	0.56	33	2	2
Build a coalition	0.307692	0.0625	0.137931	0.153846	0.153846	0	0	0.04	0.142857	0.615385	0.15625	0.333333	0.272727	0.391304	0.185185	0.185185	0.0869565	0.206897	0.178571	0.166667	0.151515	0.192308	0.346154	0.181818	0.173913	0.0344828	0.16	0	0.16	0.357143	0.0384615	0.321429	0.107143	0.296296	0.444444	0.25	0.181818	0	0.08	35	1	11
Capture and share local knowledge	0.230769	0.25	0.172414	0.346154	0.230769	0.266667	0.148148	0.04	0.0952381	0.230769	0.0625	0.259259	0.227273	0.26087	0.222222	0.148148	0.130435	0.137931	0.142857	0.0833333	0.121212	0.0769231	0.153846	0.0909091	0.217391	0.310345	0.24	0.185185	0.12	0.178571	0.153846	0.142857	0.0357143	0.148148	0.111111	0.125	0.0454545	0.137931	0.24	39	0	14
Centralize technical assistance	0	0.03125	0	0	0.0384615	0.1	0.037037	0	0	0.0384615	0	0	0.0454545	0.26087	0.037037	0	0	0.103448	0	0	0.0909091	0	0.0384615	0.0454545	0	0.0344828	0	0.111111	0	0.0357143	0.115385	0	0.107143	0	0.037037	0.0416667	0	0.0689655	0	20	0	1
Change accreditation or membership reqs	0	0	0.0344828	0	0	0	0	0.04	0	0.0769231	0.0625	0.148148	0.0454545	0	0	0	0	0	0.0357143	0.0833333	0	0.0384615	0	0.0454545	0	0	0	0	0.04	0.0357143	0	0.0357143	0	0	0	0	0	0	0	13	0	0
Change liability laws	0	0	0.0344828	0	0	0	0	0	0	0	0.03125	0.185185	0	0	0	0.0740741	0.0434783	0.0689655	0	0.0833333	0	0	0	0	0	0	0	0	0	0.0357143	0	0	0	0	0.037037	0	0	0	0	9	0	0
Change physical structure and equipment	0	0	0.0344828	0	0	0.0333333	0	0.04	0	0	0	0	0.318182	0	0	0.037037	0	0.0689655	0	0.0416667	0	0	0.0384615	0	0.478261	0	0	0	0	0.0357143	0	0.0357143	0	0	0	0	0	0.0344828	0	12	0	2
Change record system	0	0	0	0	0	0	0	0	0.047619	0.0384615	0	0.037037	0.0909091	0.0869565	0	0	0.0434783	0	0.0714286	0	0.0909091	0	0	0	0.0434783	0	0	0.037037	0	0	0	0	0	0	0	0	0	0.0689655	0.16	12	0	0
Change service sites	0.0384615	0.03125	0	0	0	0	0	0	0	0	0	0.037037	0.136364	0	0	0	0	0.0344828	0	0	0	0	0	0	0.0434783	0	0	0	0	0.0357143	0	0	0	0	0	0	0.136364	0	0	8	0	0
Conduct cyclical small tests of change	0.0769231	0.03125	0.310345	0.230769	0.384615	0.366667	0.111111	0.08	0.0952381	0	0.0625	0.037037	0.227273	0.0869565	0	0.111111	0.0434783	0.37931	0.0357143	0.125	0.030303	0.115385	0.115385	0	0.130435	0.0344828	0.12	0.259259	0.08	0.0357143	0.115385	0	0	0.111111	0.037037	0.0833333	0.0909091	0.0689655	0.12	34	0	7
Conduct educational meetings	0.269231	0.46875	0.241379	0.115385	0.0769231	0.133333	0.222222	0.12	0.0952381	0.115385	0.09375	0.148148	0.0454545	0.130435	0.222222	0.148148	0.173913	0.103448	0.0714286	0	0.212121	0.0769231	0.230769	0.0909091	0	0.793103	0.56	0.148148	0.2	0.107143	0.0769231	0.285714	0	0.185185	0.111111	0.208333	0.181818	0.0344828	0.04	36	2	10
Conduct educational outreach visits	0.192308	0.34375	0.103448	0.115385	0.0769231	0.0666667	0.148148	0.04	0.047619	0.230769	0.125	0	0	0.0434783	0.037037	0.0740741	0.0434783	0	0.142857	0.0416667	0.121212	0.0384615	0.0769231	0.0909091	0	0.275862	0.28	0.222222	0.24	0.0357143	0.0769231	0.142857	0	0.0740741	0.111111	0.125	0.0909091	0.137931	0.04	34	0	6
Conduct local consensus discussions	0.192308	0.40625	0.241379	0.307692	0.0769231	0.0666667	0.259259	0.04	0.285714	0.153846	0.28125	0.222222	0.136364	0.217391	0.222222	0.185185	0.434783	0.413793	0.464286	0.0833333	0.181818	0.269231	0.269231	0.272727	0	0.103448	0.12	0	0.2	0.392857	0.230769	0.321429	0.142857	0.259259	0.185185	0.416667	0.181818	0.0689655	0.08	37	0	21
Conduct local needs assessment	0.115385	0.03125	0.344828	0.346154	0.192308	0.0333333	0.148148	0.04	0.571429	0.115385	0.15625	0.0740741	0.181818	0.0869565	0.222222	0.259259	0.434783	0.206897	0.321429	0.0833333	0.0606061	0.192308	0.307692	0.136364	0	0.0344828	0.24	0	0	0.214286	0.5	0.142857	0.107143	0.0740741	0.111111	0.208333	0.181818	0.0344828	0.04	36	2	11
Conduct ongoing training	0.0769231	0.0625	0.0344828	0	0.0769231	0.366667	0.037037	0	0	0	0	0.037037	0	0.0434783	0.037037	0.111111	0	0	0.0357143	0	0.0909091	0.0769231	0.0769231	0	0.0869565	0.37931	0.12	0.407407	0.2	0.0357143	0.230769	0	0	0	0.037037	0.0416667	0	0.275862	0.16	25	0	6
Create a learning collaborative	0.115385	0.15625	0.0689655	0.230769	0.115385	0.333333	0.0740741	0.08	0	0.307692	0.15625	0.148148	0.181818	0.347826	0.296296	0.185185	0.0869565	0.137931	0.0357143	0.125	0.121212	0.153846	0.153846	0.0454545	0.0869565	0.448276	0.16	0.296296	0.28	0.142857	0.0769231	0.107143	0.142857	0.185185	0.222222	0.333333	0.0454545	0.206897	0.08	38	0	11
Create new clinical teams	0	0	0.0689655	0	0	0.0333333	0	0	0.0952381	0	0	0	0.0909091	0.130435	0.037037	0	0	0.0689655	0	0	0	0	0	0	0.0434783	0	0	0.0740741	0	0.0714286	0	0	0.0714286	0.037037	0.037037	0	0	0.0689655	0	14	0	0
Create or change credentialing and/or licensure standards	0	0.03125	0.0344828	0.0384615	0	0	0	0.04	0	0.0384615	0.0625	0.185185	0.0454545	0	0	0.037037	0.0434783	0	0.142857	0.166667	0	0.0384615	0	0	0.0434783	0	0	0	0.08	0	0.0384615	0.0357143	0	0.037037	0	0	0	0.0344828	0	19	0	0
Develop a formal implementation blueprint	0	0	0.0689655	0.0769231	0.192308	0.433333	0.148148	0.08	0.047619	0.0384615	0	0.0740741	0.181818	0.130435	0.0740741	0.0740741	0.130435	0.0344828	0.142857	0.0833333	0.424242	0.115385	0.115385	0.227273	0.0434783	0.137931	0.04	0.111111	0.04	0.0714286	0.730769	0	0.464286	0.111111	0.111111	0.0833333	0.0454545	0.275862	0.16	35	1	5
Develop academic partnerships	0.153846	0.25	0	0	0.0384615	0	0.037037	0.04	0.047619	0.5	0	0.111111	0.0454545	0.0869565	0	0.037037	0.0434783	0	0	0.0416667	0.030303	0.115385	0	0	0.0434783	0.103448	0.12	0.0740741	0.12	0.0357143	0.0769231	0.0714286	0.107143	0	0.259259	0.0833333	0	0	0.04	27	1	2
Develop an implementation glossary	0	0	0	0	0.0384615	0.0333333	0.037037	0.04	0	0.0384615	0	0.037037	0.0909091	0	0	0	0	0	0	0	0.0909091	0	0.0384615	0.0454545	0	0.0689655	0.04	0	0	0	0.0769231	0	0	0	0.037037	0	0	0.0344828	0	15	0	0
Develop and implement tools for quality monitoring	0	0.0625	0.0689655	0	0.115385	0.0666667	0.296296	0	0.142857	0	0.0625	0.111111	0.0454545	0	0.037037	0.037037	0.0869565	0.0344828	0.0714286	0.208333	0.272727	0	0.153846	0.0909091	0	0	0	0.037037	0.08	0.0357143	0.307692	0	0.0714286	0	0.037037	0.0416667	0	0.310345	0.6	27	1	5
Develop and organize quality monitoring systems	0	0.03125	0.0344828	0.0384615	0.0769231	0.1	0	0.04	0	0	0	0.148148	0.0454545	0	0	0.0740741	0.0869565	0.0344828	0	0.0416667	0.242424	0.0384615	0.0769231	0.0454545	0	0	0	0.0740741	0	0	0.153846	0.0357143	0.0357143	0.037037	0.037037	0.0833333	0.0454545	0.206897	0.4	26	0	3
Develop disincentives	0	0	0.0344828	0	0	0	0	0.16	0	0	0.0625	0.0740741	0.0454545	0	0.037037	0.037037	0.0869565	0	0.0714286	0.0833333	0.030303	0.0384615	0	0.227273	0	0	0	0	0.08	0.0714286	0	0.0714286	0	0	0	0	0	0	0.04	17	0	1
Develop educational materials	0.115385	0.28125	0.137931	0.115385	0	0.133333	0.333333	0	0.0952381	0.0384615	0	0.037037	0	0	0	0	0	0.0344828	0.0714286	0	0.0909091	0.0384615	0.115385	0	0.0434783	0.586207	0.36	0.185185	0.2	0.0357143	0.0769231	0.142857	0	0	0.037037	0.0416667	0.272727	0.0689655	0	26	1	5
Develop resource sharing agreements	0	0	0.0689655	0	0.0384615	0	0	0.32	0	0.307692	0	0	0.0454545	0.0434783	0	0	0	0.0344828	0	0.0416667	0	0.0384615	0.0384615	0	0.26087	0.0344828	0	0.037037	0.04	0	0.0384615	0	0.0714286	0	0.111111	0.0416667	0.0454545	0	0	19	0	3
Distribute educational materials	0.115385	0.3125	0.103448	0.115385	0.115385	0.0333333	0.185185	0	0.047619	0	0	0	0	0.0434783	0.037037	0	0.130435	0	0.0357143	0	0.030303	0.0384615	0.153846	0	0	0.551724	0.16	0.037037	0.08	0.0714286	0.0384615	0.0714286	0.0357143	0	0	0.0416667	0.181818	0.0689655	0	26	1	1
Facilitate relay of clinical data to providers	0.115385	0.0625	0.103448	0.0384615	0.0384615	0.0333333	0.0740741	0	0.0952381	0	0.0625	0.037037	0	0.0434783	0.037037	0.0740741	0.217391	0.0344828	0.0714286	0.0416667	0.363636	0.0769231	0.0384615	0.0454545	0	0.103448	0.12	0.0740741	0.08	0.0714286	0.0769231	0	0.0357143	0.0740741	0	0.0416667	0.0454545	0.103448	0.36	33	0	3
Facilitation	0.115385	0	0.103448	0.269231	0.230769	0.2	0.0740741	0.08	0	0.115385	0.125	0.037037	0.0909091	0.26087	0.296296	0.222222	0	0.241379	0.142857	0.0416667	0.181818	0.538462	0.192308	0.181818	0.0434783	0.103448	0.2	0.222222	0.08	0.107143	0.230769	0.107143	0.214286	0.185185	0.222222	0.166667	0.0454545	0.241379	0.2	36	1	14
Fund and contract for clinical innovation	0	0	0.137931	0	0.0769231	0.0333333	0.037037	0.28	0	0	0.1875	0.148148	0.136364	0	0	0.0740741	0.0869565	0.103448	0.107143	0.208333	0	0.0384615	0.0384615	0.181818	0.391304	0.0344828	0.04	0.037037	0.12	0	0	0	0.0357143	0.037037	0	0.0833333	0	0.0344828	0	25	0	3
Identify and prepare champions	0.307692	0.40625	0.448276	0.230769	0.115385	0.3	0.148148	0.12	0.047619	0.153846	0.375	0.222222	0.272727	0.173913	0.518519	0.37037	0.478261	0.206897	0.178571	0.25	0.121212	0.307692	0.192308	0.409091	0.0434783	0.241379	0.4	0.296296	0.44	0.357143	0.307692	0.642857	0.642857	0.666667	0.222222	0.625	0.227273	0.137931	0.08	39	5	22
Identify early adopters	0.192308	0.21875	0.172414	0.269231	0.153846	0.2	0.111111	0.08	0	0.0384615	0.28125	0.0740741	0.227273	0.173913	0.111111	0.296296	0.130435	0.103448	0.0714286	0.125	0.0606061	0.115385	0.115385	0.0909091	0	0.103448	0.2	0.185185	0.24	0.214286	0.115385	0.428571	0.25	0.407407	0.0740741	0.125	0.0909091	0.137931	0	36	0	12
Increase demand	0.0769231	0	0.241379	0.0384615	0	0.0333333	0.037037	0.12	0.0952381	0	0.34375	0	0	0	0.037037	0.0740741	0.130435	0	0.285714	0.0833333	0	0.0384615	0.0769231	0.272727	0.0434783	0	0.2	0	0.08	0	0	0.0357143	0.0714286	0	0.0740741	0.0833333	0.0909091	0	0	24	0	5
Inform local opinion leaders	0.269231	0.375	0.275862	0.153846	0.230769	0.133333	0.185185	0.12	0	0.153846	0.25	0.222222	0.136364	0.217391	0.222222	0.0740741	0.391304	0.0344828	0.142857	0.166667	0.181818	0.192308	0.153846	0.181818	0	0.0689655	0.28	0.037037	0.28	0.142857	0	0.571429	0.285714	0.444444	0.222222	0.291667	0.0454545	0.0344828	0.08	36	1	15
Intervene with patients/consumers to enhance uptake & adherence	0.115385	0.03125	0.0689655	0.0769231	0	0.0333333	0.0740741	0.04	0.238095	0	0.03125	0.037037	0	0	0.037037	0.037037	0	0.0344828	0.0357143	0.0416667	0	0	0.0384615	0.136364	0	0	0	0	0.08	0	0.0384615	0	0	0.037037	0	0.0416667	0.5	0.0344828	0.04	24	1	1
Involve executive boards	0.115385	0.0625	0.0344828	0	0.0769231	0	0.037037	0.2	0.047619	0.230769	0.28125	0.407407	0.136364	0.0869565	0.185185	0.111111	0.130435	0.0344828	0.107143	0.125	0	0.153846	0.153846	0.454545	0.173913	0	0	0	0	0.107143	0	0.142857	0.178571	0.185185	0.37037	0.25	0	0.0689655	0.08	30	0	7
Involve patients/consumers and family members	0.153846	0.125	0.0344828	0.0769231	0	0	0.185185	0	0.714286	0.0384615	0.28125	0.111111	0.0909091	0.0869565	0.111111	0.148148	0.217391	0.103448	0.178571	0.0416667	0.0909091	0.115385	0.0769231	0.0909091	0	0.0344828	0	0.037037	0.12	0	0.0384615	0.285714	0.0357143	0.037037	0	0.125	0.590909	0.0344828	0.04	32	2	3
Make billing easier	0.0384615	0	0	0.0384615	0	0.0333333	0	0.32	0	0	0	0.0740741	0	0	0	0.037037	0	0	0.0357143	0.0833333	0	0	0	0.0454545	0.217391	0	0	0	0	0	0	0	0	0	0	0	0	0.0344828	0	11	0	2
Make training dynamic	0	0.0625	0	0	0	0.1	0.111111	0	0	0	0	0	0.0454545	0	0	0.037037	0	0.0344828	0.0714286	0.0833333	0.0606061	0.0769231	0	0.0909091	0	0.103448	0	0.407407	0.4	0	0	0	0.0357143	0	0	0	0.0909091	0.0344828	0	17	0	2
Mandate change	0	0	0.0689655	0	0.0384615	0.0666667	0	0.08	0	0	0.09375	0.148148	0.0454545	0.0434783	0.111111	0.148148	0.130435	0.0344828	0.321429	0.125	0	0.0384615	0.0384615	0.136364	0	0	0.04	0.037037	0.12	0.0714286	0	0.0357143	0.0357143	0.037037	0	0.0416667	0	0	0	25	0	1
Model and simulate change	0	0.03125	0.103448	0.192308	0.307692	0.266667	0.111111	0.2	0	0.0769231	0.125	0.037037	0.136364	0.0434783	0.0740741	0.185185	0.130435	0.0344828	0	0	0.0909091	0.115385	0.0384615	0.136364	0	0.0689655	0.04	0.333333	0.12	0.0357143	0.0384615	0.0714286	0	0.0740741	0	0.0833333	0.0454545	0.137931	0	31	0	4
Obtain and use patients/consumers and family feedback	0.269231	0.0625	0.0689655	0.0384615	0.0384615	0	0.296296	0.04	0.761905	0	0.09375	0	0.0454545	0	0.0740741	0.0740741	0.0869565	0.103448	0.0714286	0.125	0.0909091	0.0769231	0.0769231	0.136364	0	0	0.04	0.037037	0.08	0.0357143	0.0384615	0.142857	0	0.037037	0.037037	0.125	0.409091	0	0.28	31	1	4
Obtain formal commitments	0.0384615	0	0.0689655	0	0.0384615	0	0	0	0	0.192308	0.03125	0.148148	0.0909091	0.0869565	0.037037	0.037037	0	0	0.142857	0.125	0.121212	0.0769231	0.230769	0.272727	0.130435	0	0	0	0	0.107143	0.0384615	0.0357143	0.285714	0.0740741	0.259259	0.0416667	0.0454545	0.137931	0	26	0	4
Organize clinician implementation team meetings	0.0769231	0.03125	0.137931	0.0769231	0.0769231	0.2	0.037037	0	0	0	0.03125	0	0.136364	0.521739	0.037037	0.111111	0.0869565	0.137931	0.0357143	0.0833333	0.363636	0.269231	0.0769231	0	0.0869565	0.137931	0.04	0.111111	0.12	0.214286	0.153846	0.0357143	0.214286	0.222222	0.148148	0.0416667	0	0.241379	0.28	33	1	8
Place innovation on fee for service lists/formularies	0	0.0625	0.0344828	0	0	0	0	0.24	0	0	0.0625	0.185185	0	0	0	0	0.0434783	0.0344828	0.0714286	0.0833333	0	0	0	0.136364	0.173913	0	0	0	0.08	0	0	0	0	0	0	0	0	0	0.04	13	0	1
Prepare patients/consumers to be active participants	0.0384615	0	0	0	0	0	0	0	0.47619	0	0.09375	0	0	0	0.0740741	0.0740741	0.0869565	0.0344828	0	0.0416667	0.030303	0	0.0384615	0.0454545	0	0	0	0	0	0.0357143	0	0	0	0	0.037037	0.125	0.545455	0	0.08	16	1	1
Promote adaptability	0.307692	0.03125	0.241379	0.730769	0.269231	0.4	0.481481	0.16	0.142857	0	0.0625	0	0.227273	0	0.222222	0.148148	0.173913	0.448276	0.178571	0.0416667	0.0909091	0.230769	0.153846	0.0909091	0.0434783	0.0689655	0.16	0.111111	0.28	0.0714286	0	0.0357143	0	0.111111	0.0740741	0.166667	0.0454545	0.103448	0	33	1	10
Promote network weaving	0.0384615	0	0.0344828	0.0384615	0	0	0	0	0	0.5	0.125	0.111111	0.227273	0.565217	0.111111	0.0740741	0.0434783	0	0.0357143	0.0833333	0.0606061	0.115385	0.0384615	0.0909091	0.0869565	0.103448	0.12	0.037037	0.04	0.178571	0.0384615	0.178571	0.0714286	0.148148	0.185185	0.125	0.136364	0	0	30	2	1
Provide clinical supervision	0	0.03125	0	0	0	0.0666667	0	0	0.047619	0	0	0	0	0.0434783	0.037037	0.037037	0	0.103448	0	0.0833333	0.151515	0.0384615	0	0	0	0.172414	0	0.111111	0.08	0.0357143	0	0	0.0357143	0	0	0	0	0.0344828	0.04	17	0	0
Provide local technical assistance	0	0.03125	0	0.0384615	0.153846	0.166667	0.037037	0.04	0.047619	0.0384615	0.03125	0.0740741	0.181818	0.0869565	0	0	0	0.137931	0	0	0.121212	0	0	0.0454545	0	0.241379	0	0.222222	0.16	0.0357143	0.153846	0.0357143	0.0357143	0.111111	0.185185	0.0416667	0	0.310345	0.16	27	0	3
Provide ongoing consultation	0.153846	0.09375	0.0344828	0.0769231	0.192308	0.2	0.0740741	0	0.047619	0	0.0625	0	0.0909091	0	0.148148	0.148148	0.0434783	0.0344828	0.142857	0.0416667	0.151515	0.115385	0.0769231	0.136364	0	0.172414	0.04	0.407407	0.16	0.107143	0.0384615	0.0714286	0.214286	0.148148	0.111111	0.0833333	0	0.241379	0.08	33	0	4
Purposely reexamine the implementation	0.115385	0.0625	0.0689655	0.115385	0.153846	0.166667	0.222222	0	0.047619	0.0384615	0.0625	0.111111	0	0.0434783	0.0740741	0.037037	0.0434783	0.275862	0.0357143	0.0416667	0.121212	0.0384615	0.0769231	0.0909091	0.0434783	0	0.04	0	0.04	0	0.153846	0.0357143	0.0357143	0.0740741	0.148148	0.0833333	0	0.448276	0.28	33	0	4
Recruit, designate and train for leadership	0.153846	0.03125	0.0344828	0	0	0.0666667	0	0.04	0	0.153846	0.0625	0	0.181818	0.173913	0.333333	0.259259	0.0434783	0	0.107143	0.208333	0.181818	0.346154	0.115385	0.227273	0.0434783	0.0344828	0.04	0.037037	0.04	0.25	0.115385	0.214286	0.392857	0.333333	0.037037	0.125	0.0909091	0.0689655	0.08	33	0	9
Remind clinicians	0	0	0	0	0	0	0	0	0	0	0	0	0	0.0434783	0	0	0	0	0.0357143	0	0.030303	0	0	0.0454545	0	0.0344828	0	0	0.04	0	0.0384615	0	0	0	0	0	0	0.0344828	0	8	0	0
Revise professional roles	0	0	0	0.0384615	0	0.0333333	0	0	0	0	0	0.037037	0.181818	0	0.037037	0.0740741	0	0.103448	0	0.125	0.0909091	0.0384615	0	0.0454545	0.0869565	0.0344828	0	0	0	0.178571	0	0.0357143	0.178571	0	0.037037	0	0	0.0689655	0.04	19	0	0
Shadow other experts	0.0769231	0.03125	0.0344828	0.115385	0.0384615	0.0666667	0.037037	0	0	0.0384615	0.03125	0	0.0454545	0	0.0740741	0.037037	0.0434783	0.0344828	0	0	0	0	0	0	0	0.206897	0.04	0.333333	0.08	0	0	0.0357143	0.107143	0.037037	0.037037	0	0	0	0	22	0	2
Stage implementation scale up	0	0.03125	0.103448	0	0.269231	0.3	0.037037	0.08	0	0	0.03125	0.037037	0.136364	0	0.111111	0.037037	0.0434783	0.103448	0.0714286	0.0416667	0	0.0769231	0.153846	0	0.130435	0.0344828	0.2	0.148148	0.08	0.0357143	0.153846	0.0357143	0.0714286	0.037037	0	0	0	0.0689655	0.04	29	0	3
Start a dissemination organization	0.0384615	0	0	0	0	0	0.037037	0	0.047619	0.0769231	0.0625	0	0.0909091	0.130435	0.0740741	0	0	0	0	0	0.030303	0	0	0	0	0	0.04	0	0	0	0	0	0	0.0740741	0.037037	0	0	0	0.04	13	0	0
Tailor strategies	0.153846	0.0625	0.172414	0.346154	0.230769	0.266667	0.148148	0.12	0.142857	0	0	0.111111	0.181818	0.0434783	0.296296	0.185185	0.130435	0.37931	0.142857	0.166667	0	0.0769231	0.115385	0.0454545	0.0869565	0	0.12	0.111111	0.08	0.107143	0.115385	0.0714286	0	0.037037	0.037037	0.166667	0.0909091	0.103448	0.12	34	0	5
Use advisory boards and workgroups	0.230769	0.09375	0.103448	0.0384615	0.0769231	0	0.185185	0	0.285714	0.346154	0.0625	0.148148	0.0454545	0.130435	0.222222	0.111111	0.130435	0.0344828	0.0714286	0.0416667	0.121212	0.115385	0.153846	0.181818	0.0434783	0	0.08	0.0740741	0.04	0.142857	0.153846	0.107143	0.214286	0.0740741	0.333333	0.25	0.318182	0.103448	0	35	0	8
Use an implementation adviser	0.0769231	0.0625	0.0689655	0.0769231	0.230769	0.1	0.148148	0.04	0.047619	0.0769231	0.03125	0.037037	0.0454545	0.0869565	0.037037	0.0740741	0.130435	0.103448	0.0714286	0	0.121212	0.192308	0.0384615	0.181818	0.130435	0.137931	0	0.0740741	0.04	0.142857	0.153846	0.0357143	0.285714	0	0.259259	0.0416667	0.0909091	0.206897	0.12	36	0	4
Use capitated payments	0	0	0	0	0	0	0	0.16	0	0	0	0	0	0	0	0	0	0	0.0357143	0.0416667	0	0	0	0.0454545	0.0869565	0	0	0	0	0	0	0	0	0	0	0	0	0	0.04	6	0	0
Use data experts	0	0.0625	0.103448	0.0769231	0.115385	0.0333333	0.037037	0.12	0	0.0384615	0.03125	0.037037	0	0.0434783	0	0.037037	0.173913	0	0.0714286	0	0.030303	0	0.0384615	0	0	0	0.04	0.037037	0	0	0.0384615	0.0357143	0.0357143	0	0.037037	0	0	0	0.28	23	0	1
Use data warehousing techniques	0	0.03125	0	0.0769231	0	0	0	0	0.047619	0	0	0	0	0	0	0	0	0	0	0	0	0	0.0384615	0.0454545	0	0	0	0	0	0	0	0.0357143	0	0	0	0	0	0	0.12	7	0	0
Use mass media	0	0.0625	0	0	0	0	0	0.04	0	0.0769231	0.125	0.148148	0	0.0869565	0	0.037037	0.0434783	0.0344828	0.0714286	0	0	0	0	0	0	0.0344828	0.08	0	0	0	0	0.0357143	0	0	0	0.125	0.409091	0	0	15	0	1
Use other payment schemes	0	0	0	0	0	0	0	0.2	0	0	0	0.148148	0	0	0	0	0	0	0.0714286	0.25	0	0	0	0.0454545	0.217391	0	0	0	0	0	0	0	0	0	0	0	0	0	0	6	0	3
Use train the trainer strategies	0	0.03125	0	0	0.0384615	0.0666667	0	0	0	0.0769231	0	0.037037	0	0.0869565	0	0.037037	0	0	0	0.0416667	0.030303	0.0384615	0.0769231	0	0.0869565	0.103448	0.04	0.148148	0.08	0	0	0	0.142857	0.037037	0.0740741	0.166667	0.0909091	0.0344828	0.12	23	0	0
Visit other sites	0.230769	0.125	0.206897	0.192308	0.115385	0.0333333	0.037037	0.16	0	0.384615	0.125	0.0740741	0.0454545	0.0434783	0.111111	0.148148	0.130435	0.103448	0.0357143	0.0416667	0	0.0384615	0	0.0454545	0.0869565	0.137931	0.12	0.148148	0.08	0.0714286	0.0769231	0.0714286	0.107143	0.111111	0.0740741	0.0416667	0	0.172414	0	34	0	3
Work with educational institutions	0.153846	0.15625	0.0344828	0	0	0	0.111111	0.04	0	0.192308	0.03125	0.037037	0.0454545	0.0434783	0.037037	0	0	0.0344828	0	0.0416667	0	0.0384615	0.0769231	0	0.0434783	0.0689655	0.04	0	0.04	0	0	0	0.0357143	0	0	0.0416667	0	0	0.04	22	0	0
ERIC Strategies/CFIR	43	50	54	40	44	48	45	47	35	39	50	52	52	45	47	55	47	51	53	55	49	51	51	51	41	43	44	45	51	49	44	46	44	43	46	50	38	51	43		33	332
CFIR Worksheet Number	1	2	3	4	5	6	7	8	9	10	11	12	13	14	15	16	17	18	19	20	21	22	23	24	25	26	27	28	29	30	31	32	33	34	35	36	37	38	39	Count	Min	Max
Level 1	0	0	0	1	0	0	0	1	3	3	0	0	0	2	1	1	0	0	0	1	1	1	1	0	1	3	1	0	0	0	2	2	1	1	0	1	3	0	2	33	0	3
Level 2	9	10	11	10	10	11	7	5	5	7	8	7	9	7	12	6	8	10	6	7	6	6	6	9	7	7	6	12	8	9	6	6	11	6	10	9	6	12	7	314	5	12

## Sheet: Count
Weight adjusted count grid	Intervention Source	Evidence Strength & Quality	Relative advantage	Adaptability	Trialability	Complexity	Design Quality & Packaging	Cost	Patient Needs & Resources	Cosmopolitanism	Peer Pressure	External Policy & Incentives	Structural Characteristics	Networks & Communications	Culture	Implementation Climate	Tension for Change	Compatibility	Relative Priority	Organizational Incentives & Rewards	Goals and Feedback	Learning Climate	Readiness for Implementation	Leadership Engagement	Available Resources	Access to knowledge & information	Knowledge & Beliefs about the Intervention	Self-efficacy	Individual Stage of Change	Individual Identification with Organization	Planning	Opinion Leaders	Formally appointed internal implementation leaders	Champions	External Change Agents	Key Stakeholders	Patients/ Customers	Executing	Reflecting & Evaluating	CFIR per ERIC	Level 1	Level 2
Denominator	26	32	29	26	26	30	27	25	21	26	32	27	22	23	27	27	23	29	28	24	33	26	26	22	23	29	25	27	25	28	26	28	28	27	27	24	22	29	25
Alter incentive/allowance structures	0.769231	0.625	5.51724			1.33333		8.8	1.90476		9.375	8.14815	3.63636		2.96296	8.88889	4.34783	2.06897	7.85714	14.1667	3.0303	4.61538	4.61538	6.36364	3.47826		3.2	0.740741	6.4	5.71429	2.30769	2.85714	1.42857	1.48148		3.33333		3.44828		30	1	12
Alter patient/consumer fees	0.769231							4			0.625	1.48148				0.740741				0.833333					4.34783												4.54545			8	0	3
Assess for readiness and identify barriers and facilitators	2.30769	2.5	4.82759	6.15385	6.92308	6	1.48148	3.2	6.66667	3.07692	3.125	0.740741	7.27273	2.6087	8.14815	10.3704	6.95652	6.89655	7.14286	2.5	1.21212	3.84615	16.1538	2.72727	2.6087	1.37931	4	2.22222	2.4	6.42857	8.46154	2.85714	5.71429	2.96296	2.22222	7.5	2.72727	6.2069	2.4	39	2	16
Audit and provide feedback	1.53846	2.5	2.06897	0.769231	3.07692	0.666667	0.740741	1.6	0.952381		3.125		0.909091	3.47826	0.740741	2.22222	3.47826	1.37931	2.85714	4.16667	12.1212	3.07692	0.769231	0.909091		0.689655	0.8	4.44444	1.6	1.42857		2.85714		3.7037	1.48148	0.833333		3.44828	11.2	33	2	2
Build a coalition	6.15385	1.25	2.75862	3.07692	3.07692			0.8	2.85714	12.3077	3.125	6.66667	5.45455	7.82609	3.7037	3.7037	1.73913	4.13793	3.57143	3.33333	3.0303	3.84615	6.92308	3.63636	3.47826	0.689655	3.2		3.2	7.14286	0.769231	6.42857	2.14286	5.92593	8.88889	5	3.63636		1.6	35	1	11
Capture and share local knowledge	4.61538	5	3.44828	6.92308	4.61538	5.33333	2.96296	0.8	1.90476	4.61538	1.25	5.18519	4.54545	5.21739	4.44444	2.96296	2.6087	2.75862	2.85714	1.66667	2.42424	1.53846	3.07692	1.81818	4.34783	6.2069	4.8	3.7037	2.4	3.57143	3.07692	2.85714	0.714286	2.96296	2.22222	2.5	0.909091	2.75862	4.8	39	0	14
Centralize technical assistance		0.625			0.769231	2	0.740741			0.769231			0.909091	5.21739	0.740741			2.06897			1.81818		0.769231	0.909091		0.689655		2.22222		0.714286	2.30769		2.14286		0.740741	0.833333		1.37931		20	0	1
Change accreditation or membership reqs			0.689655					0.8		1.53846	1.25	2.96296	0.909091						0.714286	1.66667		0.769231		0.909091					0.8	0.714286		0.714286								13	0	0
Change liability laws			0.689655								0.625	3.7037				1.48148	0.869565	1.37931		1.66667										0.714286					0.740741					9	0	0
Change physical structure and equipment			0.689655			0.666667		0.8					6.36364			0.740741		1.37931		0.833333			0.769231		9.56522					0.714286		0.714286						0.689655		12	0	2
Change record system									0.952381	0.769231		0.740741	1.81818	1.73913			0.869565		1.42857		1.81818				0.869565			0.740741										1.37931	3.2	12	0	0
Change service sites	0.769231	0.625										0.740741	2.72727					0.689655							0.869565					0.714286							2.72727			8	0	0
Conduct cyclical small tests of change	1.53846	0.625	6.2069	4.61538	7.69231	7.33333	2.22222	1.6	1.90476		1.25	0.740741	4.54545	1.73913		2.22222	0.869565	7.58621	0.714286	2.5	0.606061	2.30769	2.30769		2.6087	0.689655	2.4	5.18519	1.6	0.714286	2.30769			2.22222	0.740741	1.66667	1.81818	1.37931	2.4	34	0	7
Conduct educational meetings	5.38462	9.375	4.82759	2.30769	1.53846	2.66667	4.44444	2.4	1.90476	2.30769	1.875	2.96296	0.909091	2.6087	4.44444	2.96296	3.47826	2.06897	1.42857		4.24242	1.53846	4.61538	1.81818		15.8621	11.2	2.96296	4	2.14286	1.53846	5.71429		3.7037	2.22222	4.16667	3.63636	0.689655	0.8	36	2	10
Conduct educational outreach visits	3.84615	6.875	2.06897	2.30769	1.53846	1.33333	2.96296	0.8	0.952381	4.61538	2.5			0.869565	0.740741	1.48148	0.869565		2.85714	0.833333	2.42424	0.769231	1.53846	1.81818		5.51724	5.6	4.44444	4.8	0.714286	1.53846	2.85714		1.48148	2.22222	2.5	1.81818	2.75862	0.8	34	0	6
Conduct local consensus discussions	3.84615	8.125	4.82759	6.15385	1.53846	1.33333	5.18519	0.8	5.71429	3.07692	5.625	4.44444	2.72727	4.34783	4.44444	3.7037	8.69565	8.27586	9.28571	1.66667	3.63636	5.38462	5.38462	5.45455		2.06897	2.4		4	7.85714	4.61538	6.42857	2.85714	5.18519	3.7037	8.33333	3.63636	1.37931	1.6	37	0	21
Conduct local needs assessment	2.30769	0.625	6.89655	6.92308	3.84615	0.666667	2.96296	0.8	11.4286	2.30769	3.125	1.48148	3.63636	1.73913	4.44444	5.18519	8.69565	4.13793	6.42857	1.66667	1.21212	3.84615	6.15385	2.72727		0.689655	4.8			4.28571	10	2.85714	2.14286	1.48148	2.22222	4.16667	3.63636	0.689655	0.8	36	2	11
Conduct ongoing training	0.769231	1.25	0.689655		1.53846	7.33333	0.740741					0.740741		0.869565	0.740741	2.22222			0.714286		1.81818	1.53846	1.53846		1.73913	7.58621	2.4	8.14815	4	0.714286	4.61538				0.740741	0.833333		5.51724	3.2	25	0	6
Create a learning collaborative	2.30769	3.125	1.37931	4.61538	2.30769	6.66667	1.48148	1.6		6.15385	3.125	2.96296	3.63636	6.95652	5.92593	3.7037	1.73913	2.75862	0.714286	2.5	2.42424	3.07692	3.07692	0.909091	1.73913	8.96552	3.2	5.92593	5.6	2.85714	1.53846	2.14286	2.85714	3.7037	4.44444	6.66667	0.909091	4.13793	1.6	38	0	11
Create new clinical teams			1.37931			0.666667			1.90476				1.81818	2.6087	0.740741			1.37931							0.869565			1.48148		1.42857			1.42857	0.740741	0.740741			1.37931		14	0	0
Create or change credentialing and/or licensure standards		0.625	0.689655	0.769231				0.8		0.769231	1.25	3.7037	0.909091			0.740741	0.869565		2.85714	3.33333		0.769231			0.869565				1.6		0.769231	0.714286		0.740741				0.689655		19	0	0
Develop a formal implementation blueprint			1.37931	1.53846	3.84615	8.66667	2.96296	1.6	0.952381	0.769231		1.48148	3.63636	2.6087	1.48148	1.48148	2.6087	0.689655	2.85714	1.66667	8.48485	2.30769	2.30769	4.54545	0.869565	2.75862	0.8	2.22222	0.8	1.42857	14.6154		9.28571	2.22222	2.22222	1.66667	0.909091	5.51724	3.2	35	1	5
Develop academic partnerships	3.07692	5			0.769231		0.740741	0.8	0.952381	10		2.22222	0.909091	1.73913		0.740741	0.869565			0.833333	0.606061	2.30769			0.869565	2.06897	2.4	1.48148	2.4	0.714286	1.53846	1.42857	2.14286		5.18519	1.66667			0.8	27	1	2
Develop an implementation glossary					0.769231	0.666667	0.740741	0.8		0.769231		0.740741	1.81818								1.81818		0.769231	0.909091		1.37931	0.8				1.53846				0.740741			0.689655		15	0	0
Develop and implement tools for quality monitoring		1.25	1.37931		2.30769	1.33333	5.92593		2.85714		1.25	2.22222	0.909091		0.740741	0.740741	1.73913	0.689655	1.42857	4.16667	5.45455		3.07692	1.81818				0.740741	1.6	0.714286	6.15385		1.42857		0.740741	0.833333		6.2069	12	27	1	5
Develop and organize quality monitoring systems		0.625	0.689655	0.769231	1.53846	2		0.8				2.96296	0.909091			1.48148	1.73913	0.689655		0.833333	4.84848	0.769231	1.53846	0.909091				1.48148			3.07692	0.714286	0.714286	0.740741	0.740741	1.66667	0.909091	4.13793	8	26	0	3
Develop disincentives			0.689655					3.2			1.25	1.48148	0.909091		0.740741	0.740741	1.73913		1.42857	1.66667	0.606061	0.769231		4.54545					1.6	1.42857		1.42857							0.8	17	0	1
Develop educational materials	2.30769	5.625	2.75862	2.30769		2.66667	6.66667		1.90476	0.769231		0.740741						0.689655	1.42857		1.81818	0.769231	2.30769		0.869565	11.7241	7.2	3.7037	4	0.714286	1.53846	2.85714			0.740741	0.833333	5.45455	1.37931		26	1	5
Develop resource sharing agreements			1.37931		0.769231			6.4		6.15385			0.909091	0.869565				0.689655		0.833333		0.769231	0.769231		5.21739	0.689655		0.740741	0.8		0.769231		1.42857		2.22222	0.833333	0.909091			19	0	3
Distribute educational materials	2.30769	6.25	2.06897	2.30769	2.30769	0.666667	3.7037		0.952381					0.869565	0.740741		2.6087		0.714286		0.606061	0.769231	3.07692			11.0345	3.2	0.740741	1.6	1.42857	0.769231	1.42857	0.714286			0.833333	3.63636	1.37931		26	1	1
Facilitate relay of clinical data to providers	2.30769	1.25	2.06897	0.769231	0.769231	0.666667	1.48148		1.90476		1.25	0.740741		0.869565	0.740741	1.48148	4.34783	0.689655	1.42857	0.833333	7.27273	1.53846	0.769231	0.909091		2.06897	2.4	1.48148	1.6	1.42857	1.53846		0.714286	1.48148		0.833333	0.909091	2.06897	7.2	33	0	3
Facilitation	2.30769		2.06897	5.38462	4.61538	4	1.48148	1.6		2.30769	2.5	0.740741	1.81818	5.21739	5.92593	4.44444		4.82759	2.85714	0.833333	3.63636	10.7692	3.84615	3.63636	0.869565	2.06897	4	4.44444	1.6	2.14286	4.61538	2.14286	4.28571	3.7037	4.44444	3.33333	0.909091	4.82759	4	36	1	14
Fund and contract for clinical innovation			2.75862		1.53846	0.666667	0.740741	5.6			3.75	2.96296	2.72727			1.48148	1.73913	2.06897	2.14286	4.16667		0.769231	0.769231	3.63636	7.82609	0.689655	0.8	0.740741	2.4				0.714286	0.740741		1.66667		0.689655		25	0	3
Identify and prepare champions	6.15385	8.125	8.96552	4.61538	2.30769	6	2.96296	2.4	0.952381	3.07692	7.5	4.44444	5.45455	3.47826	10.3704	7.40741	9.56522	4.13793	3.57143	5	2.42424	6.15385	3.84615	8.18182	0.869565	4.82759	8	5.92593	8.8	7.14286	6.15385	12.8571	12.8571	13.3333	4.44444	12.5	4.54545	2.75862	1.6	39	5	22
Identify early adopters	3.84615	4.375	3.44828	5.38462	3.07692	4	2.22222	1.6		0.769231	5.625	1.48148	4.54545	3.47826	2.22222	5.92593	2.6087	2.06897	1.42857	2.5	1.21212	2.30769	2.30769	1.81818		2.06897	4	3.7037	4.8	4.28571	2.30769	8.57143	5	8.14815	1.48148	2.5	1.81818	2.75862		36	0	12
Increase demand	1.53846		4.82759	0.769231		0.666667	0.740741	2.4	1.90476		6.875				0.740741	1.48148	2.6087		5.71429	1.66667		0.769231	1.53846	5.45455	0.869565		4		1.6			0.714286	1.42857		1.48148	1.66667	1.81818			24	0	5
Inform local opinion leaders	5.38462	7.5	5.51724	3.07692	4.61538	2.66667	3.7037	2.4		3.07692	5	4.44444	2.72727	4.34783	4.44444	1.48148	7.82609	0.689655	2.85714	3.33333	3.63636	3.84615	3.07692	3.63636		1.37931	5.6	0.740741	5.6	2.85714		11.4286	5.71429	8.88889	4.44444	5.83333	0.909091	0.689655	1.6	36	1	15
Intervene with patients/consumers to enhance uptake & adherence	2.30769	0.625	1.37931	1.53846		0.666667	1.48148	0.8	4.7619		0.625	0.740741			0.740741	0.740741		0.689655	0.714286	0.833333			0.769231	2.72727					1.6		0.769231			0.740741		0.833333	10	0.689655	0.8	24	1	1
Involve executive boards	2.30769	1.25	0.689655		1.53846		0.740741	4	0.952381	4.61538	5.625	8.14815	2.72727	1.73913	3.7037	2.22222	2.6087	0.689655	2.14286	2.5		3.07692	3.07692	9.09091	3.47826					2.14286		2.85714	3.57143	3.7037	7.40741	5		1.37931	1.6	30	0	7
Involve patients/consumers and family members	3.07692	2.5	0.689655	1.53846			3.7037		14.2857	0.769231	5.625	2.22222	1.81818	1.73913	2.22222	2.96296	4.34783	2.06897	3.57143	0.833333	1.81818	2.30769	1.53846	1.81818		0.689655		0.740741	2.4		0.769231	5.71429	0.714286	0.740741		2.5	11.8182	0.689655	0.8	32	2	3
Make billing easier	0.769231			0.769231		0.666667		6.4				1.48148				0.740741			0.714286	1.66667				0.909091	4.34783													0.689655		11	0	2
Make training dynamic		1.25				2	2.22222						0.909091			0.740741		0.689655	1.42857	1.66667	1.21212	1.53846		1.81818		2.06897		8.14815	8				0.714286				1.81818	0.689655		17	0	2
Mandate change			1.37931		0.769231	1.33333		1.6			1.875	2.96296	0.909091	0.869565	2.22222	2.96296	2.6087	0.689655	6.42857	2.5		0.769231	0.769231	2.72727			0.8	0.740741	2.4	1.42857		0.714286	0.714286	0.740741		0.833333				25	0	1
Model and simulate change		0.625	2.06897	3.84615	6.15385	5.33333	2.22222	4		1.53846	2.5	0.740741	2.72727	0.869565	1.48148	3.7037	2.6087	0.689655			1.81818	2.30769	0.769231	2.72727		1.37931	0.8	6.66667	2.4	0.714286	0.769231	1.42857		1.48148		1.66667	0.909091	2.75862		31	0	4
Obtain and use patients/consumers and family feedback	4.61538	1.25	1.37931	0.769231	0.769231		5.92593	0.8	15.2381		1.875		0.909091		1.48148	1.48148	1.73913	2.06897	1.42857	2.5	1.81818	1.53846	1.53846	2.72727			0.8	0.740741	1.6	0.714286	0.769231	2.85714		0.740741	0.740741	2.5	8.18182		5.6	31	1	4
Obtain formal commitments	0.769231		1.37931		0.769231					3.84615	0.625	2.96296	1.81818	1.73913	0.740741	0.740741			2.85714	2.5	2.42424	1.53846	4.61538	5.45455	2.6087					2.14286	0.769231	0.714286	5.71429	1.48148	5.18519	0.833333	0.909091	2.75862		26	0	4
Organize clinician implementation team meetings	1.53846	0.625	2.75862	1.53846	1.53846	4	0.740741				0.625		2.72727	10.4348	0.740741	2.22222	1.73913	2.75862	0.714286	1.66667	7.27273	5.38462	1.53846		1.73913	2.75862	0.8	2.22222	2.4	4.28571	3.07692	0.714286	4.28571	4.44444	2.96296	0.833333		4.82759	5.6	33	1	8
Place innovation on fee for service lists/formularies		1.25	0.689655					4.8			1.25	3.7037					0.869565	0.689655	1.42857	1.66667				2.72727	3.47826				1.6										0.8	13	0	1
Prepare patients/consumers to be active participants	0.769231								9.52381		1.875				1.48148	1.48148	1.73913	0.689655		0.833333	0.606061		0.769231	0.909091						0.714286					0.740741	2.5	10.9091		1.6	16	1	1
Promote adaptability	6.15385	0.625	4.82759	14.6154	5.38462	8	9.62963	3.2	2.85714		1.25		4.54545		4.44444	2.96296	3.47826	8.96552	3.57143	0.833333	1.81818	4.61538	3.07692	1.81818	0.869565	1.37931	3.2	2.22222	5.6	1.42857		0.714286		2.22222	1.48148	3.33333	0.909091	2.06897		33	1	10
Promote network weaving	0.769231		0.689655	0.769231						10	2.5	2.22222	4.54545	11.3043	2.22222	1.48148	0.869565		0.714286	1.66667	1.21212	2.30769	0.769231	1.81818	1.73913	2.06897	2.4	0.740741	0.8	3.57143	0.769231	3.57143	1.42857	2.96296	3.7037	2.5	2.72727			30	2	1
Provide clinical supervision		0.625				1.33333			0.952381					0.869565	0.740741	0.740741		2.06897		1.66667	3.0303	0.769231				3.44828		2.22222	1.6	0.714286			0.714286					0.689655	0.8	17	0	0
Provide local technical assistance		0.625		0.769231	3.07692	3.33333	0.740741	0.8	0.952381	0.769231	0.625	1.48148	3.63636	1.73913				2.75862			2.42424			0.909091		4.82759		4.44444	3.2	0.714286	3.07692	0.714286	0.714286	2.22222	3.7037	0.833333		6.2069	3.2	27	0	3
Provide ongoing consultation	3.07692	1.875	0.689655	1.53846	3.84615	4	1.48148		0.952381		1.25		1.81818		2.96296	2.96296	0.869565	0.689655	2.85714	0.833333	3.0303	2.30769	1.53846	2.72727		3.44828	0.8	8.14815	3.2	2.14286	0.769231	1.42857	4.28571	2.96296	2.22222	1.66667		4.82759	1.6	33	0	4
Purposely reexamine the implementation	2.30769	1.25	1.37931	2.30769	3.07692	3.33333	4.44444		0.952381	0.769231	1.25	2.22222		0.869565	1.48148	0.740741	0.869565	5.51724	0.714286	0.833333	2.42424	0.769231	1.53846	1.81818	0.869565		0.8		0.8		3.07692	0.714286	0.714286	1.48148	2.96296	1.66667		8.96552	5.6	33	0	4
Recruit, designate and train for leadership	3.07692	0.625	0.689655			1.33333		0.8		3.07692	1.25		3.63636	3.47826	6.66667	5.18519	0.869565		2.14286	4.16667	3.63636	6.92308	2.30769	4.54545	0.869565	0.689655	0.8	0.740741	0.8	5	2.30769	4.28571	7.85714	6.66667	0.740741	2.5	1.81818	1.37931	1.6	33	0	9
Remind clinicians														0.869565					0.714286		0.606061			0.909091		0.689655			0.8		0.769231							0.689655		8	0	0
Revise professional roles				0.769231		0.666667						0.740741	3.63636		0.740741	1.48148		2.06897		2.5	1.81818	0.769231		0.909091	1.73913	0.689655				3.57143		0.714286	3.57143		0.740741			1.37931	0.8	19	0	0
Shadow other experts	1.53846	0.625	0.689655	2.30769	0.769231	1.33333	0.740741			0.769231	0.625		0.909091		1.48148	0.740741	0.869565	0.689655								4.13793	0.8	6.66667	1.6			0.714286	2.14286	0.740741	0.740741					22	0	2
Stage implementation scale up		0.625	2.06897		5.38462	6	0.740741	1.6			0.625	0.740741	2.72727		2.22222	0.740741	0.869565	2.06897	1.42857	0.833333		1.53846	3.07692		2.6087	0.689655	4	2.96296	1.6	0.714286	3.07692	0.714286	1.42857	0.740741				1.37931	0.8	29	0	3
Start a dissemination organization	0.769231						0.740741		0.952381	1.53846	1.25		1.81818	2.6087	1.48148						0.606061						0.8							1.48148	0.740741				0.8	13	0	0
Tailor strategies	3.07692	1.25	3.44828	6.92308	4.61538	5.33333	2.96296	2.4	2.85714			2.22222	3.63636	0.869565	5.92593	3.7037	2.6087	7.58621	2.85714	3.33333		1.53846	2.30769	0.909091	1.73913		2.4	2.22222	1.6	2.14286	2.30769	1.42857		0.740741	0.740741	3.33333	1.81818	2.06897	2.4	34	0	5
Use advisory boards and workgroups	4.61538	1.875	2.06897	0.769231	1.53846		3.7037		5.71429	6.92308	1.25	2.96296	0.909091	2.6087	4.44444	2.22222	2.6087	0.689655	1.42857	0.833333	2.42424	2.30769	3.07692	3.63636	0.869565		1.6	1.48148	0.8	2.85714	3.07692	2.14286	4.28571	1.48148	6.66667	5	6.36364	2.06897		35	0	8
Use an implementation adviser	1.53846	1.25	1.37931	1.53846	4.61538	2	2.96296	0.8	0.952381	1.53846	0.625	0.740741	0.909091	1.73913	0.740741	1.48148	2.6087	2.06897	1.42857		2.42424	3.84615	0.769231	3.63636	2.6087	2.75862		1.48148	0.8	2.85714	3.07692	0.714286	5.71429		5.18519	0.833333	1.81818	4.13793	2.4	36	0	4
Use capitated payments								3.2											0.714286	0.833333				0.909091	1.73913														0.8	6	0	0
Use data experts		1.25	2.06897	1.53846	2.30769	0.666667	0.740741	2.4		0.769231	0.625	0.740741		0.869565		0.740741	3.47826		1.42857		0.606061		0.769231				0.8	0.740741			0.769231	0.714286	0.714286		0.740741				5.6	23	0	1
Use data warehousing techniques		0.625		1.53846					0.952381														0.769231	0.909091								0.714286							2.4	7	0	0
Use mass media		1.25						0.8		1.53846	2.5	2.96296		1.73913		0.740741	0.869565	0.689655	1.42857							0.689655	1.6					0.714286				2.5	8.18182			15	0	1
Use other payment schemes								4				2.96296							1.42857	5				0.909091	4.34783															6	0	3
Use train the trainer strategies		0.625			0.769231	1.33333				1.53846		0.740741		1.73913		0.740741				0.833333	0.606061	0.769231	1.53846		1.73913	2.06897	0.8	2.96296	1.6				2.85714	0.740741	1.48148	3.33333	1.81818	0.689655	2.4	23	0	0
Visit other sites	4.61538	2.5	4.13793	3.84615	2.30769	0.666667	0.740741	3.2		7.69231	2.5	1.48148	0.909091	0.869565	2.22222	2.96296	2.6087	2.06897	0.714286	0.833333		0.769231		0.909091	1.73913	2.75862	2.4	2.96296	1.6	1.42857	1.53846	1.42857	2.14286	2.22222	1.48148	0.833333		3.44828		34	0	3
Work with educational institutions	3.07692	3.125	0.689655				2.22222	0.8		3.84615	0.625	0.740741	0.909091	0.869565	0.740741			0.689655		0.833333		0.769231	1.53846		0.869565	1.37931	0.8		0.8				0.714286			0.833333			0.8	22	0	0
Access new funding		0.625	2.06897		0.769231	0.666667	0.740741	14.4		0.769231	1.25	1.48148	0.909091	0.869565				0.689655	2.14286	7.5	0.606061	0.769231	0.769231	1.81818	15.6522		1.6			0.714286	1.53846		1.42857	0.740741		0.833333	0.909091	0.689655		27	2	1
ERIC Strategies/CFIR	43	50	54	40	44	48	45	47	35	39	50	52	52	45	47	55	47	51	53	55	49	51	51	51	41	43	44	45	51	49	44	46	44	43	46	50	38	51	43		33	332
CFIR Worksheet Number	1	2	3	4	5	6	7	8	9	10	11	12	13	14	15	16	17	18	19	20	21	22	23	24	25	26	27	28	29	30	31	32	33	34	35	36	37	38	39	Count	Min	Max
Level 1	0	0	0	1	0	0	0	1	3	3	0	0	0	2	1	1	0	0	0	1	1	1	1	0	1	3	1	0	0	0	2	2	1	1	0	1	3	0	2	33	0	3
Level 2	9	10	11	10	10	15	7	9	5	7	8	7	9	7	12	6	8	10	6	7	6	6	6	9	7	7	11	12	12	9	6	6	11	6	10	9	6	12	8	332	5	15
